# Supplementary material for: Deep-rooted pigeon pea promotes the water relations and survival of shallow-rooted finger millet during drought—Despite strong competitive interactions at ambient water availability
Source: PLoS One. 2020 Feb 13;15(2):e0228993. doi: 10.1371/journal.pone.0228993 (PMC7018066; doi:10.1371/journal.pone.0228993)
Supplement: S3 Table — (XLSX) [file pone.0228993.s003.xlsx]

## Sheet: Sheet1
		Foliar damage (%)
CMN level	Treatments	Mean	Std err
Without CMN	Control (FM)	100	0
	NSR	93.142	2.97526
	SR	88.622	3.08802
With CMN	Control (FM)	100	0
	NSR	78.548	8.02519
	SR	76.508	9.19299
Abbreviations
CMN	common mycorrhizal network
NSR	Non-Split Root
SR	Split Root
FM	Finger millet
PP	Pigeon Pea
